# Supplementary material for: Effect of Acupuncture Intervention and Manipulation Types on Poststroke Dysarthria: A Systematic Review and Meta-Analysis
Source: Evid Based Complement Alternat Med. 2020 Sep 14;2020:4981945. doi: 10.1155/2020/4981945 (PMC7509576; doi:10.1155/2020/4981945)
Supplement: Supplementary Materials — Supplementary file 1 lists the PRISMA checklist of this study. Supplementary file 2 summarizes the intervention types, improved cases in the treatment group and the control group, and mean and standard deviation values of the FDA total scores and the FDA-a-points between pre- and post-treatment periods. [file 4981945.f1.zip]

Archive with 2 entries (2 files):
- 4981945.f1/Supplemental File 1.docx
- 4981945.f1/Supplemental File 2.xlsx
