# Supplementary material for: Effect of Acupuncture Intervention and Manipulation Types on Poststroke Dysarthria: A Systematic Review and Meta-Analysis
Source: Evid Based Complement Alternat Med. 2020 Sep 14;2020:4981945. doi: 10.1155/2020/4981945 (PMC7509576; doi:10.1155/2020/4981945)
Supplement: Supplementary Materials — Supplementary file 1 lists the PRISMA checklist of this study. Supplementary file 2 summarizes the intervention types, improved cases in the treatment group and the control group, and mean and standard deviation values of the FDA total scores and the FDA-a-points between pre- and post-treatment periods. [file 4981945.f1.zip › 4981945.f1/Supplemental File 2.xlsx]

## Sheet: Sheet1
Author	Group	improved cases_treatment group	total cases_treatment group	improved cases_control group	total cases_control group	mean value of the FDA total score in pretreatment in the treatment group	standard deviation of the FDA total score in pretreatment in the treatment group	mean value of the FDA total score in posttreatment in the treatment group	standard deviation of the FDA total score in posttreatment in the treatment group	mean value of the FDA total score in pretreatment in the control group	standard deviation of the FDA total score in pretreatment in the control group	mean value of the FDA total score in posttreatment in the control group	standard deviation of the FDA total score in posttreatment in the control group	mean value of the FDA a-points in pretreatment in the treatment group	standard deviation of the FDA a-points in pretreatment in the treatment group	mean value of the FDA a-points in posttreatment in the treatment group	standard deviation of the FDA a-points in posttreatment in the treatment group	mean value of the FDA a-points in pretreatment in the control group	standard deviation of the FDA a-points in pretreatment in the control group	mean value of the FDA a-points in posttreatment in the control group	standard deviation of the FDA a-points in posttreatment in the control group
Luo et al. (2012)	AT plus SLT vs. SLT	30	32	21	28
Feng et al. (2015)	AT plus GM vs. GM	64	72	55	72	49. 53	12. 98	75. 43	13. 78	47. 2	13. 29	68. 84	14. 62
Liang et al. (2014)	AT plus SLT vs. SLT	50	65	32	65
Wang et al. (2016)	AT plus SLT vs. SLT	59	60	45	60
Li et al. (2015)	AT plus SLT vs. SLT	84	89	52	85									5. 81	4. 49	16. 23	8. 11	6. 69	6. 30	7. 88	6. 54
Guan et al. (2016)	AT plus GM vs. GM	56	60	48	60
Zeng et al. (2011)	AT plus SLT vs. SLT	29	30	20	30
Hu et al. (2011)	AT plus SLT vs. SLT	51	56	34	56
Lai et al. (2011)	AT plus SLT vs. SLT	59	65	41	63
Shi et al. (2012)	AT plus SLT vs. SLT	26	30	18	27
Han et al. (2014)	AT plus SLT vs. SLT	29	30	14	30									13.8	3.5	22.3	5.1	14.2	3.1	17.9	6.8
Liu et al. (2012)	AT plus SLT vs. SLT	29	30	19	30
Jia et al. (2016)	AT plus SLT vs. SLT	27	30	23	30
Yang et al. (2017)	EA plus SLT vs. SLT	38	40	25	40
Kang et al. (2017)	AT plus SLT vs. SLT	39	44	34	44									5.6	2.85	16.32	7.83	5.18	2.94	7.39	3.67
